# Supplementary material for: Complement C5 is not critical for the formation of sub-RPE deposits in Efemp1 mutant mice
Source: PubMed Central journal article supplement (PMC8128922; doi:10.1038/s41598-021-89978-8), 2021-05-17
Supplement: 41598_2021_89978_MOESM1_ESM.pdf [file 41598_2021_89978_MOESM1_ESM.pdf]

## Supplementary Information

Title: **Complement C5 is not critical for the formation of sub-RPE deposits in *Efemp1* mutant mice.**

Authors: *Donita L. Garland<sup>1</sup>, Eric A. Pierce<sup>1</sup>, and Rosario Fernandez-Godino<sup>1\*</sup>.*

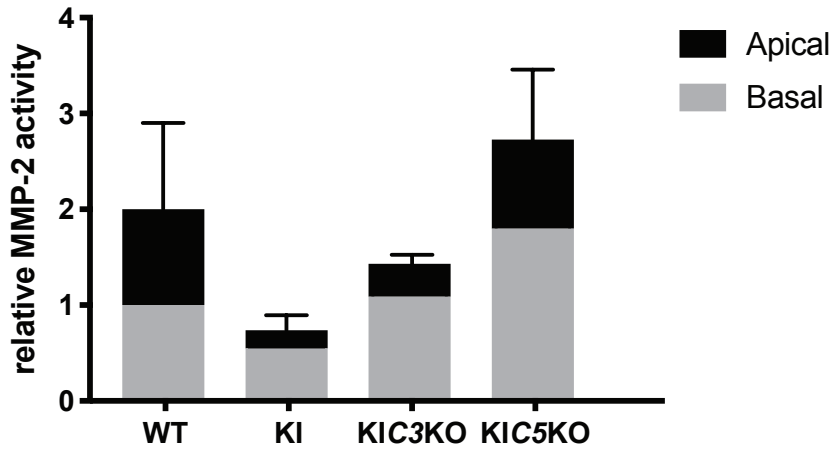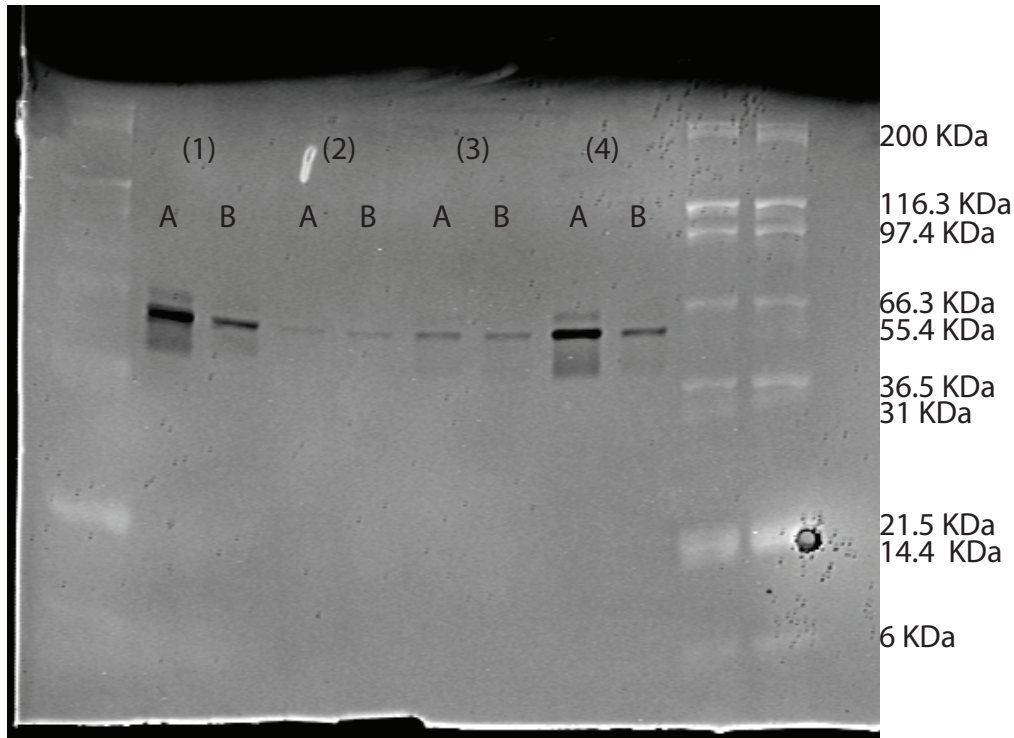

**Supplementary figure 1.** Quantification of the MMP-2 activity measured by zymography in apical (A) and basal (B) conditioned media of (1) *Efemp1*<sup>WT/WT</sup>:*C5*<sup>+/+</sup>, (2) *Efemp1*<sup>R345W/R345W</sup>:*C5*<sup>+/+</sup>, (3) *Efemp1*<sup>R345W/R345W</sup>:*C3*<sup>-/-</sup> and (4) *Efemp1*<sup>R345W/R345W</sup>:*C5*<sup>-/-</sup> cultures. The first and two last lanes were loaded with Mark12 unstained standard (Thermo Fisher). Values were normalized to apical and basal MMP-2 activity in wild type samples.
